# Supplementary material for: A metabolic modeling-based framework for predicting trophic dependencies in native rhizobiomes of crop plants
Source: eLife. 2024 Oct 17;13:RP94558. doi: 10.7554/eLife.94558 (PMC11486489; doi:10.7554/eLife.94558)
Supplement: Figure 2—source data 2. — Treatment types are fully described in Berihu et al., 2023. [file elife-94558-fig2-data2.xlsx]

## Sheet: גיליון1
Treatment	Sample	# Reads	# Mapped Reads vs Bins	Mapping Rates
1	BjSa_G210_1	318022594	112624412	35.41
1	BjSa_G210_2	281761476	99921545	35.46
1	BjSa_G210_3	416038372	145599092	35
1	BjSa_G210_4	282301036	95304805	33.76
1	BjSa_G210_5	447141566	160309647	35.85
2	BjSa_M26_1	376878959	135763911	36.02
2	BjSa_M26_2	347182908	122895292	35.4
2	BjSa_M26_3	416564165	144390674	34.66
2	BjSa_M26_4	665109915	236939650	35.62
2	BjSa_M26_5	467544898	162091275	34.67
3	Can_G210_1	337813971	109814240	32.51
3	Can_G210_2	326790059	105115075	32.17
3	Can_G210_3	290305045	94566244	32.57
3	Can_G210_4	467206263	153295356	32.81
3	Can_G210_5	317179883	98665507	31.11
4	Can_M26_1	346489491	116381526	33.59
4	Can_M26_2	332022731	107875006	32.49
4	Can_M26_3	281669999	93377935	33.15
4	Can_M26_4	352892914	114191672	32.36
4	Can_M26_5	423521175	142376677	33.62
5	NTC_G210_1	322470447	101793678	31.57
5	NTC_G210_2	381163976	116560703	30.58
5	NTC_G210_3	394506571	128257851	32.51
5	NTC_G210_4	289809167	88881030	30.67
5	NTC_G210_5	440239346	132706841	30.14
6	NTC_M26_1	359395622	106970231	29.76
6	NTC_M26_2	567592079	177868308	31.34
6	NTC_M26_3	619940510	189976498	30.64
6	NTC_M26_4	371318086	108134325	29.12
6	NTC_M26_5	340890336	102616038	30.1
