# Supplementary material for: A metabolic modeling-based framework for predicting trophic dependencies in native rhizobiomes of crop plants
Source: eLife. 2024 Oct 17;13:RP94558. doi: 10.7554/eLife.94558 (PMC11486489; doi:10.7554/eLife.94558)
Supplement: Figure 4—source data 1. [file elife-94558-fig4-data1.xlsx]

## Sheet: גיליון1
Inorganic Compounds	Root Exudates	Organic Phosphorous Compounds
Sodium	Pyruvate	AMP C10H12N5O7P
Hydrogen peroxide	Benzoate	CMP C9H12N3O8P
Inorganic triphosphate	L-Cysteine	DTMP C10H13N2O8P
Chromate	Urea	D-Glucose 1-phosphate
Iron (Fe3+)	Gallic acid	Glycerophosphoserine
Diphosphate	D-Galacturonate	UDP-glucose
Cadmium	L-Asparagine	Coenzyme A
2 Hydroxylamino 4 6 dinitrotoluene	Quinate	D-Mannose 1-phosphate
Copper	L-Valine	2(alpha-D-Mannosyl-6-phosphate)-D-glycerate
Nitrite	L-Aspartate	UDP-N-acetyl-3-O-(1-carboxyvinyl)-D-glucosamine
Copper	Succinate	2',3'-Cyclic AMP
Arsenite	Galactitol	2',3'-Cyclic CMP
Nickel	4-Hydroxybenzoate	2',3'-Cyclic GMP
Mercury	Beta-Alanine	Guanosine 3 phosphate C10H12N5O8P
Hydrogen	D-Galactose	D-Fructose 6-phosphate
Ammonia	Trans-Cinnamate	Glycerophosphoglycerol
Ammonium	Ferulate	NMN C11H14N2O8P
Potassium	D-Sorbitol	Phosphate
Silver	D-Malate	Diphosphate
Reduced ferredoxin	D-Ribose	Alpha,alpha'-Trehalose 6-phosphate
Oxidized ferredoxin	D-Lactate	3 AMP C10H12N5O7P
Polyphosphate 50	3,4-Dihydroxy-trans-cinnamate	Sn-Glycero-3-phosphocholine
Hydrogen sulfide	D-Xylose	Sn-Glycero-3-phosphoethanolamine
Zinc	Glycerate	Sn-Glycero-3-phospho-1-inositol
Arsenate	Malonate	D-Glucuronate 1-phosphate
Phosphonate	Oxalate	Glycerol 2-phosphate
Magnesium	D-Erythrose	O-Phospho-L-serine
Manganese	Glycerol	Alpha-D-Ribose 5-phosphate
Nitrous oxide	Octadecanoic acid	UMP C9H11N2O9P
Sulfur	Salicin	Undecaprenyl diphosphate
Fe2+ mitochondria	Esculin	2-Phosphoglycolate
H2O	Rhamnose	Propanoyl phosphate
[3Fe-4S] damaged iron-sulfur cluster	3,4-Dihydroxybenzoate	Beta D glucose 6 phosphate C6H11O9P
Molybdate		3 CMP C9H12N3O8P
[4Fe-4S] iron-sulfur cluster		3 UMP C9H11N2O9P
Chloride		Glycerol 3-phosphate
Superoxide anion		GMP C10H12N5O8P
Sulfate		UDP-N-acetyl-D-glucosamine
Nitrogen		2-Aminoethylphosphonate
Cobalt		Undecaprenyl phosphate
Tetrathionate
2 Hydroxylamino 4 6 dinitrotoluene
4 Hydroxylamino 2 6 dinitrotoluene
Trithionate
Selenate
Calcium
Nitric oxide
Phosphate
Thiosulfate
