# Supplementary material for: A metabolic modeling-based framework for predicting trophic dependencies in native rhizobiomes of crop plants
Source: eLife. 2024 Oct 17;13:RP94558. doi: 10.7554/eLife.94558 (PMC11486489; doi:10.7554/eLife.94558)
Supplement: Figure 4—source data 3. [file elife-94558-fig4-data3.xlsx]

## Sheet: גיליון1
BiGG Identifier	Name	Elements
EX_cell4_e	Cellulose - 4 glucose units	['C', 'H', 'O']
EX_cell6_e	Cellulose - 6 glucose units	['C', 'H', 'O']
EX_3amp_e	3-Adenosine-monophosphate	['C', 'H', 'N', 'O', 'P']
EX_3cmp_e	3-Cytosine-monophosphate	['C', 'H', 'N', 'O', 'P']
EX_3gmp_e	3-Guanine-monophosphate	['C', 'H', 'N', 'O', 'P']
EX_ade_e	Adenine	['C', 'H', 'N']
EX_agm_e	Agmatine	['C', 'H', 'N']
EX_amp_e	Adenosine-monophosphate	['C', 'H', 'N', 'O', 'P']
EX_arg__L_e	Arginine	['C', 'H', 'N', 'O']
EX_asn__L_e	Asparagine	['C', 'H', 'N', 'O']
EX_ca2_e	Calcium	['Ca']
EX_cl_e	Chlorine	['Cl']
EX_cmp_e	Cytidine-monophosphate	['C', 'H', 'N', 'O', 'P']
EX_coa_e	Co-enzyme A	['C', 'H', 'N', 'O', 'P', 'S']
EX_cobalt2_e	Cobalt	['Co']
EX_cu2_e	Copper	['Cu']
EX_cyst__L_e	Cysteine	['C', 'H', 'N', 'O', 'S']
EX_fe2_e	Fe2+	['Fe']
EX_fe3_e	Fe3+	['Fe']
EX_fe3dcit_e	Fe3+ di-citrate	['C', 'Fe', 'H', 'O']
EX_fe3pyovd_kt_e	Pyoverdine	['C', 'Fe', 'H', 'N', 'O']
EX_feenter_e	Enterobactin	['C', 'Fe', 'H', 'N', 'O']
EX_gln__L_e	Glutamine	['C', 'H', 'N', 'O']
EX_his__L_e	Histidine	['C', 'H', 'N', 'O']
EX_hom__L_e	Homoserine	['C', 'H', 'N', 'O']
EX_ile__L_e	Isoleucine	['K']
EX_k_e	Potassium	['C', 'H', 'N', 'O']
EX_leu__L_e	Leucine	['C', 'H', 'N', 'O']
EX_lys__L_e	Lysine	['C', 'H', 'N', 'O']
EX_mg2_e	Magnesium	['Mg']
EX_mn2_e	Manganese	['Mn']
EX_nh4_e	Ammonium	['H', 'N']
EX_nmn_e	Nicotine-mononucleotide	['C', 'H', 'N', 'O', 'P']
EX_no2_e	Nitrite	['N', 'O']
EX_no3_e	Nitrate	['N', 'O']
EX_o2_e	Oxygen	['O']
EX_orn__L_e	Ornithine	['C', 'H', 'N', 'O']
EX_phe__L_e	Phenylalanine	['H', 'O', 'P']
EX_pi_e	Phosphate	['H', 'O', 'P']
EX_ppi_e	Diphosphate	['C', 'H', 'N', 'O']
EX_pro__L_e	Proline	['C', 'Fe', 'H', 'N', 'O']
EX_salchs4fe_e	Salmochelin	['O', 'S']
EX_so4_e	Sulfate	['C', 'H', 'N', 'O']
EX_thm_e	Thiamin	['C', 'H', 'N', 'O']
EX_thr__L_e	Threonine	['C', 'H']
EX_tol_e	Toluene	['O']
EX_trp__L_e	Tryptophan	['H', 'O']
EX_tsul_e	Thiosulfate	['C', 'H', 'N', 'O']
EX_tyr__L_e	Tyrosine	['C', 'H', 'N', 'O']
EX_ump_e	Uracil-monophosphate	['Zn']
EX_val__L_e	Valine	['O', 'S']
EX_zn2_e	Zinc	['C', 'Fe', 'H', 'N', 'O']
EX_tet_e	Tetrathionate	['Cu']
EX_fe3dhbzs3_e	2-3-dihydroxybenzoylserine	['C', 'Fe', 'H', 'N', 'O']
EX_cu_e	Copper	['H', 'O', 'S']
EX_fcmcbtt_e	Carboxymyobactin	['C', 'H', 'N', 'O']
EX_tton_e	Trithionate
EX_fol_e	Folate
